# Supplementary material for: Enhancing MgO efficiency in CO2 capture: engineered MgO/Mg(OH)2 composites with Cl−, SO42−, and PO43− additives
Source: Royal Society of Chemistry journal article supplement (doi:10.1039/d3ra04080a), 2023-01-01
Supplement: d3ra04080a1.pdf [file d3ra04080a1.pdf]

## Enhancing MgO Efficiency in CO<sub>2</sub> Capture: Engineered MgO/Mg(OH)<sub>2</sub> Composites with Cl<sup>-</sup>, SO<sub>4</sub><sup>2-</sup>, and PO<sub>4</sub><sup>3-</sup> Additives

Hasanthi L. Senevirathna<sup>a</sup>, Shunlian Wu<sup>a</sup>, Cathie Lee<sup>a</sup>, Jin-Young Kim<sup>b</sup>, Sang Sub Kim<sup>b</sup>, Kewu Bai<sup>c</sup>, Ping Wu<sup>\*a</sup>

<sup>a</sup>Entropic Interface Group, Engineering Product Development, Singapore University of Technology and Design, 8 Somapah Road, Singapore 487372.

<sup>b</sup>Department of Materials Science and Engineering, Inha University, Incheon 22212, Korea.

<sup>c</sup>Institute of High Performance Computing, Agency for Science, Technology and Research, Fusionopolis Way, #16-16 Connexis, Singapore 138632, Singapore.

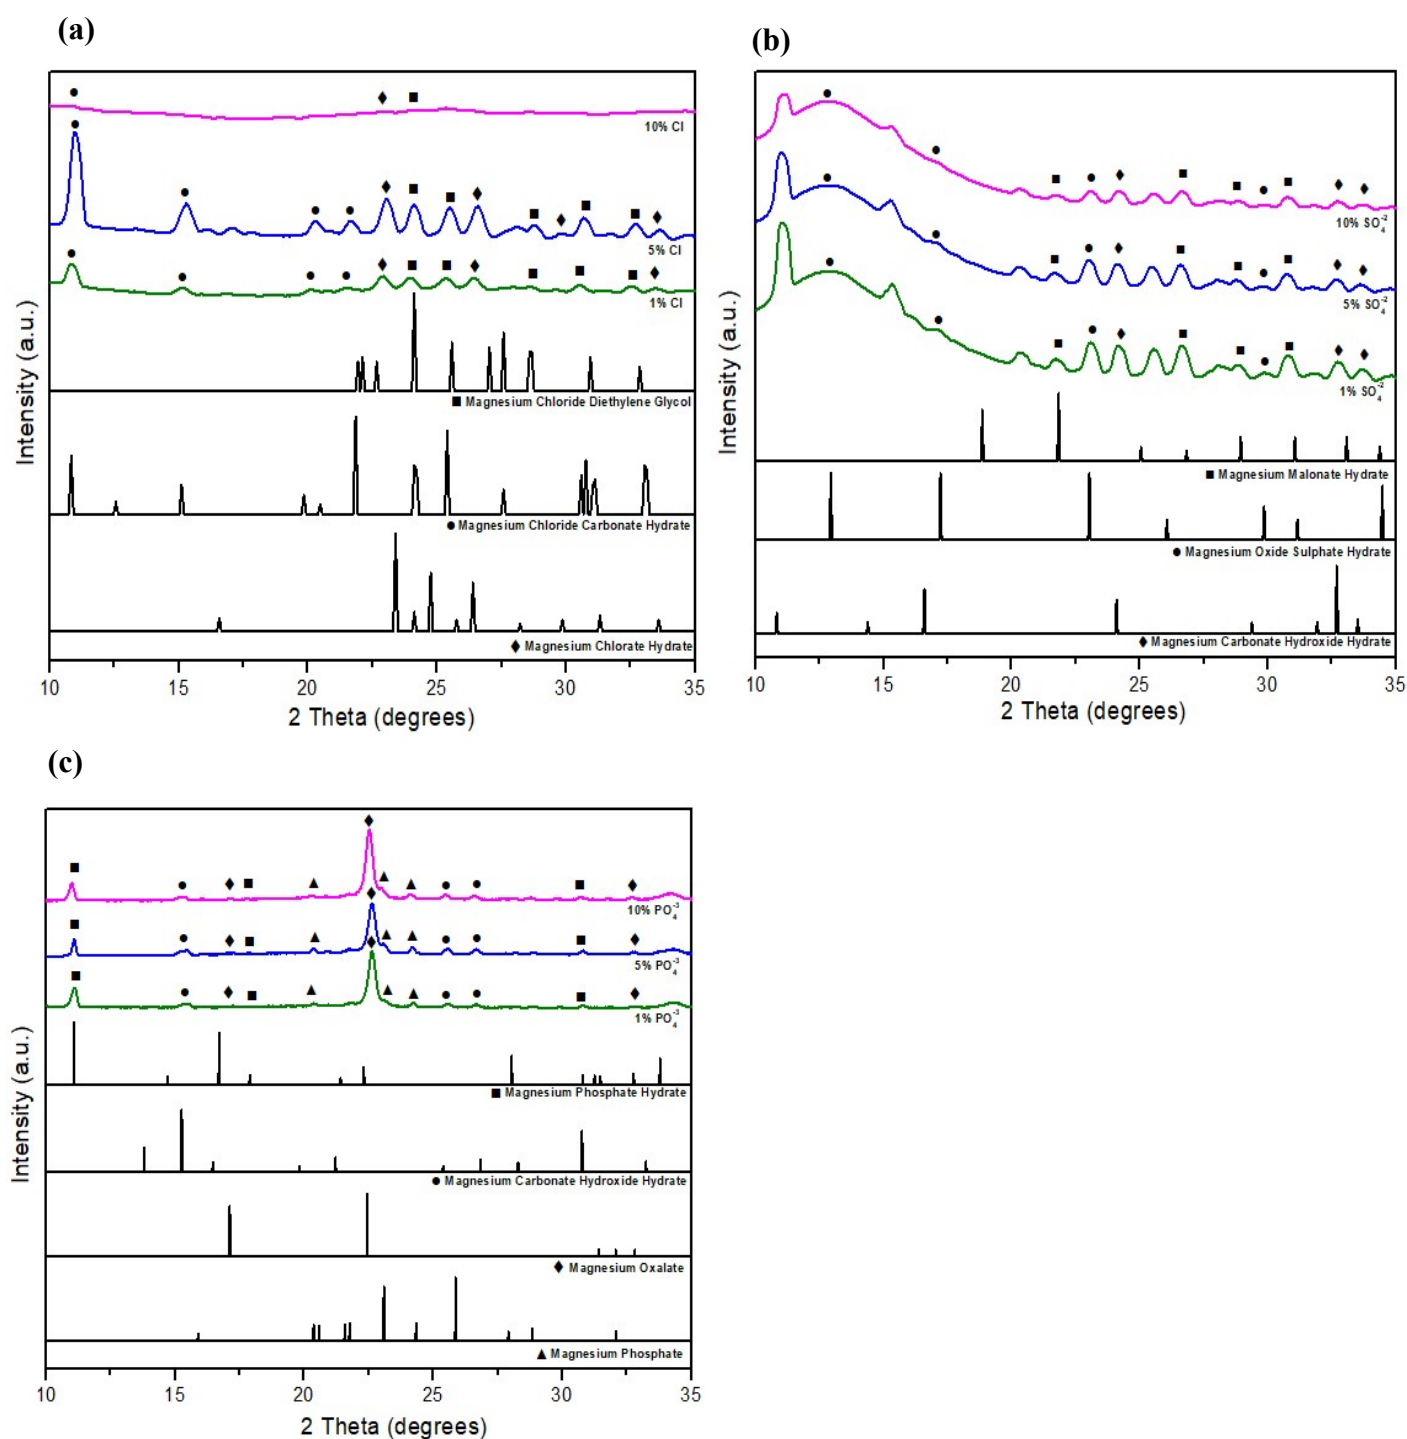

**Fig. S1** (a) Magnification of the broader peaks  $2\theta = 10^\circ - 35^\circ$  associated with hydrates in the samples with increasing  $\text{Cl}^-$  percentage. (b) Magnification of peaks  $2\theta = 10^\circ - 35^\circ$  associated with hydrates related to  $\text{SO}_4^{2-}$  in the samples with increasing  $\text{SO}_4^{2-}$  percentage. (c) Magnification of peaks  $2\theta = 10^\circ - 35^\circ$  associated with hydrates related to  $\text{PO}_4^{3-}$  in the samples with increasing  $\text{PO}_4^{3-}$  percentage.
